# Supplementary material for: In vitro digestion and fermentation characteristics of eight kinds of pulses and suggestions for different populations
Source: Royal Society of Chemistry journal article supplement (doi:10.1039/d4fo00551a), 2024-01-01
Supplement: d4fo00551a1.pdf [file d4fo00551a1.pdf]

### Supplementary information

**Table S1:** Total starch, protein, total dietary fiber (TDF), ash, fat and total available carbohydrate (TAC) contents.

**Table S2:** Starch digestion kinetic parameters of pulse flours and pastes

**Table S4:** Representative indicators for factor analysis.

**Table S5:** Total variance explained.

**Table S6:** Variance of common factor.

**Table S7:** Rotated component matrix.

**Table S8:** Factor scores of flours and pastes.

**Fig. S1:** Gravel figure.

**Fig. S2:** Component plot in rotated space.

**Table S1.** Total starch, protein, total dietary fiber (TDF), ash, fat and total available carbohydrate (TAC) contents

|                            |        | Total starch<br>(g/100 g<br>DM) | Protein<br>(g/100 g<br>DM) | TDF<br>(g/100g<br>DM)       | TAC<br>(g/100 g<br>DM)        | Fat (g/100<br>g DM) | Ash (g/100<br>g DM) | Energy values<br>(Kcal. /100 g) |
|----------------------------|--------|---------------------------------|----------------------------|-----------------------------|-------------------------------|---------------------|---------------------|---------------------------------|
| White kidney<br>bean flour |        | 42.04±0.35 <sup>f</sup><br>d    | 28.10±0.15<br>d            | 15.60±0.40<br>a             | 49.27±0.47<br>d               | 1.63 ± 0.04<br>d    | 5.39 ± 0.08<br>a    | 285.30±0.70 <sup>e</sup>        |
| Adzuki<br>flour            | bean   | 49.58±0.21<br>b                 | 28.31±0.47<br>d            | 12.63±0.16<br>cd            | 55.09±0.48<br>b               | 0.35 ± 0.02<br>g    | 3.62 ± 0.05<br>d    | 297.39±1.48 <sup>d</sup>        |
| Cowpea<br>flour            |        | 44.59±0.65<br>cd                | 36.55±0.78<br>a            | 13.88±0.11<br>b             | 43.36±0.99<br>g               | 1.86 ± 0.10<br>b    | 4.36 ± 0.03<br>b    | 294.79±3.34 <sup>d</sup>        |
| Yellow<br>flour            | pea    | 52.54±0.38<br>a                 | 27.11±0.16<br>c            | 14.26±0.11<br>b             | 53.89±0.22<br>c               | 1.78 ± 0.01<br>bc   | 2.96 ± 0.04<br>f    | 295.52±0.50 <sup>d</sup>        |
| Mung<br>flour              | bean   | 49.71±0.10<br>b                 | 28.37±0.14<br>d            | 8.87±0.08 <sup>f</sup><br>c | 57.77±0.25<br>a               | 1.40 ± 0.04<br>c    | 3.59 ± 0.07<br>d    | 316.38±0.79 <sup>b</sup>        |
| Broad<br>flour             | bean   | 45.37±0.35<br>c                 | 35.40±0.26<br>b            | 13.03±0.20<br>c             | 46.70±0.13 <sup>f</sup><br>cd | 1.70 ± 0.08<br>cd   | 3.17 ± 0.02<br>e    | 308.50±0.31 <sup>c</sup>        |
| Chickpea<br>flour          |        | 44.09±0.13<br>de                | 30.45±0.90<br>c            | 12.37±0.72<br>c             | 48.28±0.27<br>e               | 5.92 ± 0.03<br>a    | 2.97 ± 0.07<br>f    | 332.75±3.22 <sup>a</sup>        |
| White<br>flour             | lentil | 43.40±0.25<br>c                 | 28.13±0.86<br>d            | 11.47±0.11<br>c             | 55.83±0.86<br>b               | 0.77 ± 0.02<br>f    | 3.80 ± 0.08<br>c    | 309.91±3.15 <sup>c</sup>        |

Data was presented as mean ± standard deviation (n=3). Different superscript letters in the same row denoted a significant difference according to one-way ANOVA with Tukey's post-hoc test ( $p < 0.05$ ).

**Table S2.** Starch digestion kinetic parameters of pulse flours and pastes

|                            | $C_{\infty}$              | K                        | R <sup>2</sup> | HI                       | eGI                      | eGL                     |
|----------------------------|---------------------------|--------------------------|----------------|--------------------------|--------------------------|-------------------------|
| Flour                      |                           |                          |                |                          |                          |                         |
| White kidney<br>bean flour | 65.83±0.97 <sup>c</sup>   | 0.23±0.02 <sup>bc</sup>  | 0.984          | 65.41±0.58 <sup>c</sup>  | 64.58±0.50 <sup>c</sup>  | 2.55±0.02 <sup>f</sup>  |
| Adzuki<br>flour            | 72.42±0.99 <sup>b</sup>   | 0.21±0.04 <sup>bc</sup>  | 0.979          | 71.24±1.16 <sup>b</sup>  | 69.61±1.00 <sup>b</sup>  | 3.08±0.04 <sup>a</sup>  |
| Cowpea<br>flour            | 80.85±3.51 <sup>a</sup>   | 0.03±0.00 <sup>d</sup>   | 0.905          | 58.98±0.47 <sup>c</sup>  | 59.04±0.41 <sup>c</sup>  | 2.04±0.01 <sup>h</sup>  |
| Yellow<br>flour            | 73.05±0.35 <sup>b</sup>   | 0.36±0.45 <sup>a</sup>   | 0.997          | 72.31±0.28 <sup>ab</sup> | 70.53±0.24 <sup>ab</sup> | 3.01±0.01 <sup>b</sup>  |
| Mung<br>flour              | 64.25±0.21 <sup>c</sup>   | 0.30±0.01 <sup>ab</sup>  | 0.977          | 63.61±0.35 <sup>cd</sup> | 63.03±0.30 <sup>cd</sup> | 2.94±0.01 <sup>c</sup>  |
| Broad<br>flour             | 64.25±0.53 <sup>c</sup>   | 0.17±0.02 <sup>c</sup>   | 0.986          | 63.24±0.52 <sup>d</sup>  | 62.71±0.44 <sup>d</sup>  | 2.39±0.02 <sup>g</sup>  |
| Chickpea<br>flour          | 75.88±1.08 <sup>ab</sup>  | 0.20±0.08 <sup>bc</sup>  | 0.948          | 73.20±0.52 <sup>a</sup>  | 71.29±0.44 <sup>a</sup>  | 2.83±0.02 <sup>d</sup>  |
| White<br>flour             | 73.17±2.56 <sup>b</sup>   | 0.05±0.01 <sup>d</sup>   | 0.936          | 57.75±0.62 <sup>c</sup>  | 57.98±0.53 <sup>c</sup>  | 2.66±0.02 <sup>e</sup>  |
| Paste                      |                           |                          |                |                          |                          |                         |
| White kidney<br>bean paste | 67.76±0.03 <sup>cd</sup>  | 0.27±0.03 <sup>ab</sup>  | 0.992          | 67.61±0.98 <sup>c*</sup> | 66.48±0.85 <sup>c*</sup> | 2.55±0.03 <sup>c</sup>  |
| Adzuki<br>paste            | 67.39±0.81 <sup>d*</sup>  | 0.28±0.01 <sup>ab</sup>  | 0.995          | 66.60±1.06 <sup>c*</sup> | 65.60±0.92 <sup>c*</sup> | 2.90±0.04 <sup>c*</sup> |
| Cowpea<br>paste            | 69.40±0.04 <sup>c*</sup>  | 0.20±0.00 <sup>b*</sup>  | 0.996          | 67.23±0.09 <sup>c*</sup> | 66.15±0.08 <sup>c*</sup> | 2.25±0.01 <sup>g*</sup> |
| Yellow<br>paste            | 92.59±0.26 <sup>a*</sup>  | 0.25±0.03 <sup>ab</sup>  | 0.995          | 89.52±0.10 <sup>a*</sup> | 85.36±0.09 <sup>a*</sup> | 3.92±0.01 <sup>a*</sup> |
| Mung<br>paste              | 82.39±0.94 <sup>b*</sup>  | 0.19±0.07 <sup>b</sup>   | 0.968          | 80.21±0.19 <sup>b*</sup> | 77.34±0.17 <sup>b*</sup> | 3.56±0.01 <sup>b*</sup> |
| Broad<br>paste             | 64.93±0.76 <sup>c</sup>   | 0.29±0.06 <sup>ab*</sup> | 0.989          | 63.97±0.13 <sup>d</sup>  | 63.34±0.11 <sup>d</sup>  | 2.44±0.02 <sup>f</sup>  |
| Chickpea<br>paste          | 68.49±0.15 <sup>cd*</sup> | 0.36±0.04 <sup>a*</sup>  | 0.990          | 66.12±0.54 <sup>c*</sup> | 65.20±0.47 <sup>c*</sup> | 2.66±0.03 <sup>d*</sup> |
| White<br>paste             | 51.86±0.29 <sup>f*</sup>  | 0.30±0.06 <sup>ab*</sup> | 0.988          | 51.40±0.85 <sup>c*</sup> | 52.50±0.73 <sup>c*</sup> | 2.48±0.12 <sup>f*</sup> |

$C_{\infty}$  and k were calculated by the kinetic equation:  $C = C_{\infty} \times (1 - e^{-kt})$ . Data was presented as mean ± standard deviation (n=3). Different superscript letters in the same row denoted a significant difference according to one-way ANOVA with Tukey's post-hoc test ( $p < 0.05$ ). "\*" The significant difference was found between the pulse flour and its paste according to the independent-sample t-test ( $p < 0.05$ ).

**Table S3.** Representative indicators for factor analysis

|                         | ReGI  | ReGL  | RS    | T-scfa | B-acid | S-pH  |
|-------------------------|-------|-------|-------|--------|--------|-------|
| Flour                   |       |       |       |        |        |       |
| White kidney bean flour | 15.48 | 39.24 | 32.65 | 94.45  | 13.07  | 0.25  |
| Adzuki bean flour       | 14.37 | 32.45 | 25.15 | 81.26  | 11.53  | 0.25  |
| Cowpea flour            | 16.94 | 48.98 | 11.28 | 84.43  | 11.54  | 0.50  |
| Yellow pea flour        | 14.18 | 33.26 | 25.68 | 81.97  | 11.32  | 0.62  |
| Mung bean flour         | 15.86 | 34.07 | 28.97 | 78.22  | 9.63   | 0.28  |
| Broad bean flour        | 15.95 | 41.81 | 32.57 | 79.94  | 11.70  | 0.88  |
| Chickpea flour          | 14.03 | 35.33 | 19.91 | 88.04  | 8.42   | 1.46  |
| White lentil flour      | 17.25 | 37.55 | 18.98 | 100.05 | 8.61   | 1.26  |
| Paste                   |       |       |       |        |        |       |
| White kidney bean paste | 15.04 | 39.27 | 31.20 | 66.44  | 7.62   | 0.31  |
| Adzuki bean paste       | 15.24 | 34.53 | 31.52 | 73.97  | 10.13  | 0.56  |
| Cowpea paste            | 15.12 | 44.45 | 28.56 | 79.07  | 10.96  | 0.13  |
| Yellow pea paste        | 11.71 | 25.54 | 4.86  | 85.69  | 11.93  | 1.11  |
| Mung bean paste         | 12.93 | 28.06 | 16.52 | 48.84  | 4.78   | 0.17  |
| Broad bean paste        | 15.79 | 41.06 | 32.01 | 73.31  | 9.74   | -0.13 |
| Chickpea paste          | 15.34 | 37.64 | 31.78 | 80.38  | 10.42  | 0.06  |
| White lentil paste      | 19.05 | 40.39 | 47.46 | 87.06  | 14.12  | 0.41  |

**Table S4.** Total variance explained

| Component | Initial Eigenvalues |              | Extraction Sums of Squared loadings |              | Rotation Sums of Squared loadings |              |
|-----------|---------------------|--------------|-------------------------------------|--------------|-----------------------------------|--------------|
|           | Total               | Cumulative % | Total                               | Cumulative % | Total                             | Cumulative % |
| 1         | 2.656               | 44.270       | 2.656                               | 44.270       | 1.576                             | 26.265       |
| 2         | 1.739               | 73.261       | 1.739                               | 73.261       | 1.485                             | 51.009       |
| 3         | 0.754               | 85.825       | 0.754                               | 85.825       | 1.352                             | 73.539       |
| 4         | 0.530               | 94.650       | 0.530                               | 94.650       | 1.267                             | 94.650       |
| 5         | 0.188               | 97.778       |                                     |              |                                   |              |
| 6         | 0.133               | 100.000      |                                     |              |                                   |              |

**Table S5.** Variance of common factor

| Indicators | A (ReGI) | B (ReGL) | C (RS) | D (T-scfa) | E (B-acid) | F (S-pH) |
|------------|----------|----------|--------|------------|------------|----------|
| Initial    | 1        | 1        | 1      | 1          | 1          | 1        |
| Extraction | 0.923    | 0.958    | 0.966  | 0.919      | 0.964      | 0.949    |

**Table S6.** Rotated component matrix

| Indicators | Component    |              |              |              |
|------------|--------------|--------------|--------------|--------------|
|            | 1            | 2            | 3            | 4            |
| B (ReGL)   | <b>0.951</b> | 0.162        | -0.131       | 0.095        |
| A (ReGI)   | <b>0.736</b> | 0.177        | 0.118        | 0.580        |
| E (B-acid) | 0.137        | <b>0.955</b> | -0.031       | 0.178        |
| D (T-scfa) | 0.247        | <b>0.702</b> | 0.604        | 0.024        |
| F (S-pH)   | -0.129       | 0.031        | <b>0.941</b> | -0.214       |
| C (RS)     | -0.182       | -0.144       | 0.263        | <b>0.918</b> |

**Table S7.** Factor scores of flours and pastes

|                         | Factor 1 | Factor 2 | Factor 3 | Factor 4 | Total score (F1+F4) | Total score (all) |
|-------------------------|----------|----------|----------|----------|---------------------|-------------------|
| <i>Flour</i>            |          |          |          |          |                     |                   |
| White kidney bean flour | 0.00     | 1.51     | -0.39    | 0.21     | 0.05                | 0.35              |
| Adzuki bean flour       | -0.89    | 0.77     | -0.61    | -0.13    | -0.28               | -0.22             |
| Cowpea flour            | 2.39     | 0.35     | -0.23    | -1.98    | 0.22                | 0.26              |
| Yellow pea flour        | -0.85    | 0.55     | 0.04     | -0.03    | -0.24               | -0.09             |
| Mung bean flour         | -0.30    | -0.29    | -0.15    | 0.58     | 0.05                | -0.06             |
| Broad bean flour        | 0.47     | 0.13     | 0.51     | 0.48     | 0.24                | 0.39              |
| Chickpea flour          | -0.24    | -0.69    | 1.97     | -0.30    | -0.13               | 0.15              |
| White lentil flour      | 0.85     | -0.57    | 2.39     | 0.07     | 0.25                | 0.67              |
| <i>Paste</i>            |          |          |          |          |                     |                   |
| White kidney bean paste | 0.31     | -1.40    | -0.43    | 0.37     | 0.17                | -0.30             |
| Adzuki bean paste       | -0.53    | -0.32    | 0.05     | 0.73     | 0.02                | -0.05             |
| Cowpea paste            | 0.91     | 0.30     | -1.00    | -0.53    | 0.13                | -0.03             |
| Yellow pea paste        | -1.95    | 1.23     | 0.58     | -1.85    | -0.95               | -0.49             |
| Mung bean paste         | -1.09    | -2.46    | -0.94    | -0.51    | -0.42               | -1.29             |
| Broad bean paste        | 0.59     | -0.29    | -1.23    | 0.18     | 0.21                | -0.16             |
| Chickpea paste          | -0.03    | 0.19     | -0.76    | 0.33     | 0.06                | -0.07             |
| White lentil paste      | 0.38     | 0.99     | 0.20     | 2.37     | 0.63                | 0.94              |

\* The scores for each factor were calculated by using regression methods in SPSS, and the total scores were weighted and summed according to the factor loadings.

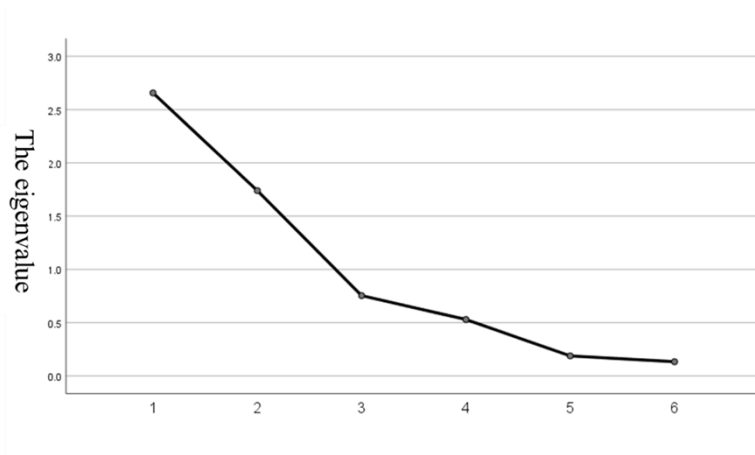

Fig. S1. Gravel figure

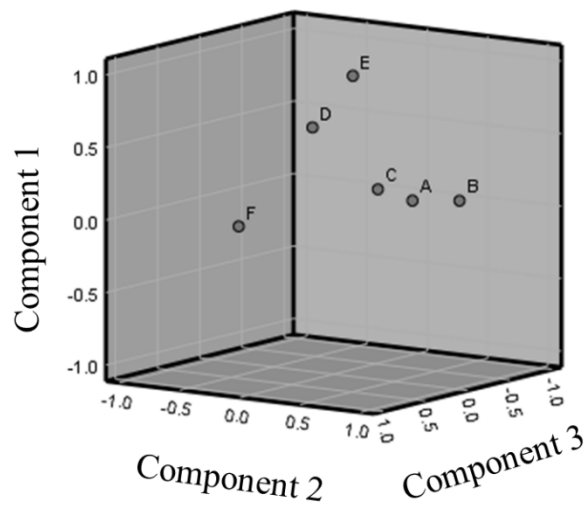

Fig. S2. Component plot in rotated space
